# Supplementary material for: Oncogenic Potential of Bisphenol A and Common Environmental Contaminants in Human Mammary Epithelial Cells
Source: MDPI journal article supplement (doi:10.3390/ijms21103735), 2020-05-25
Supplement: s1 [file s1]

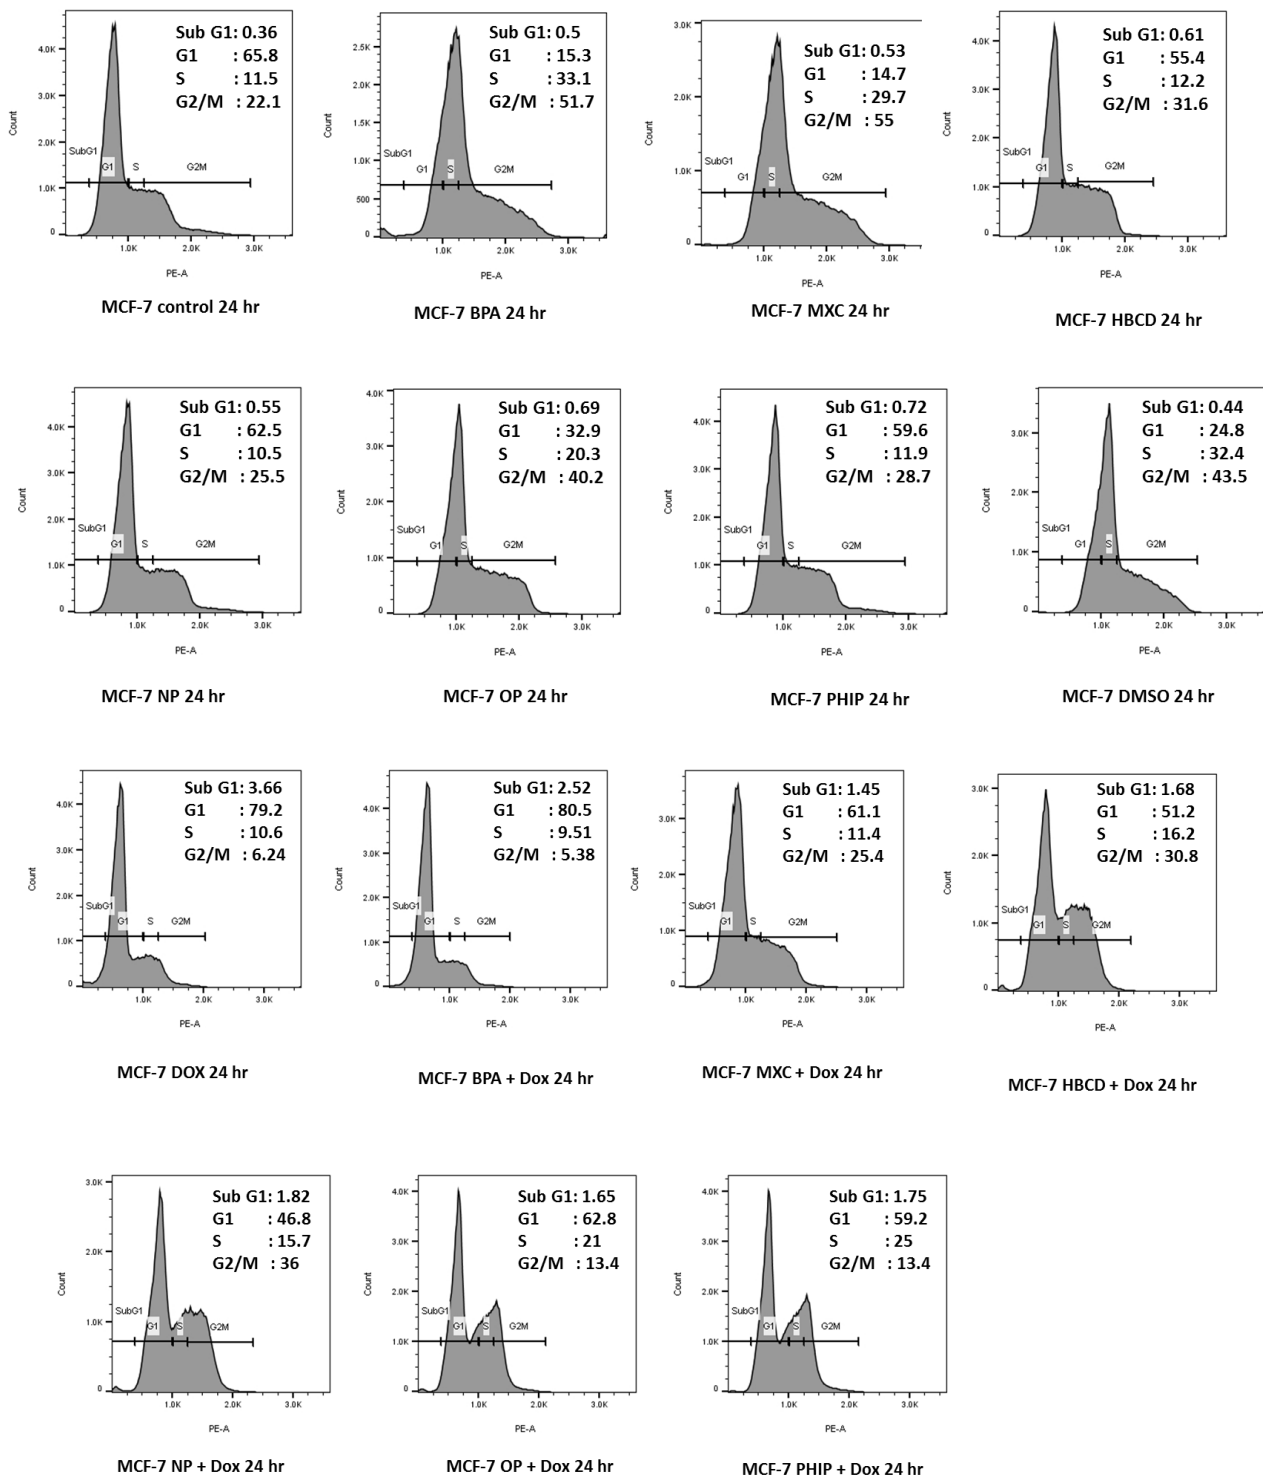

**Figure 1 : Cell cycle analysis of MCF-7 at 24 hr incubation.**

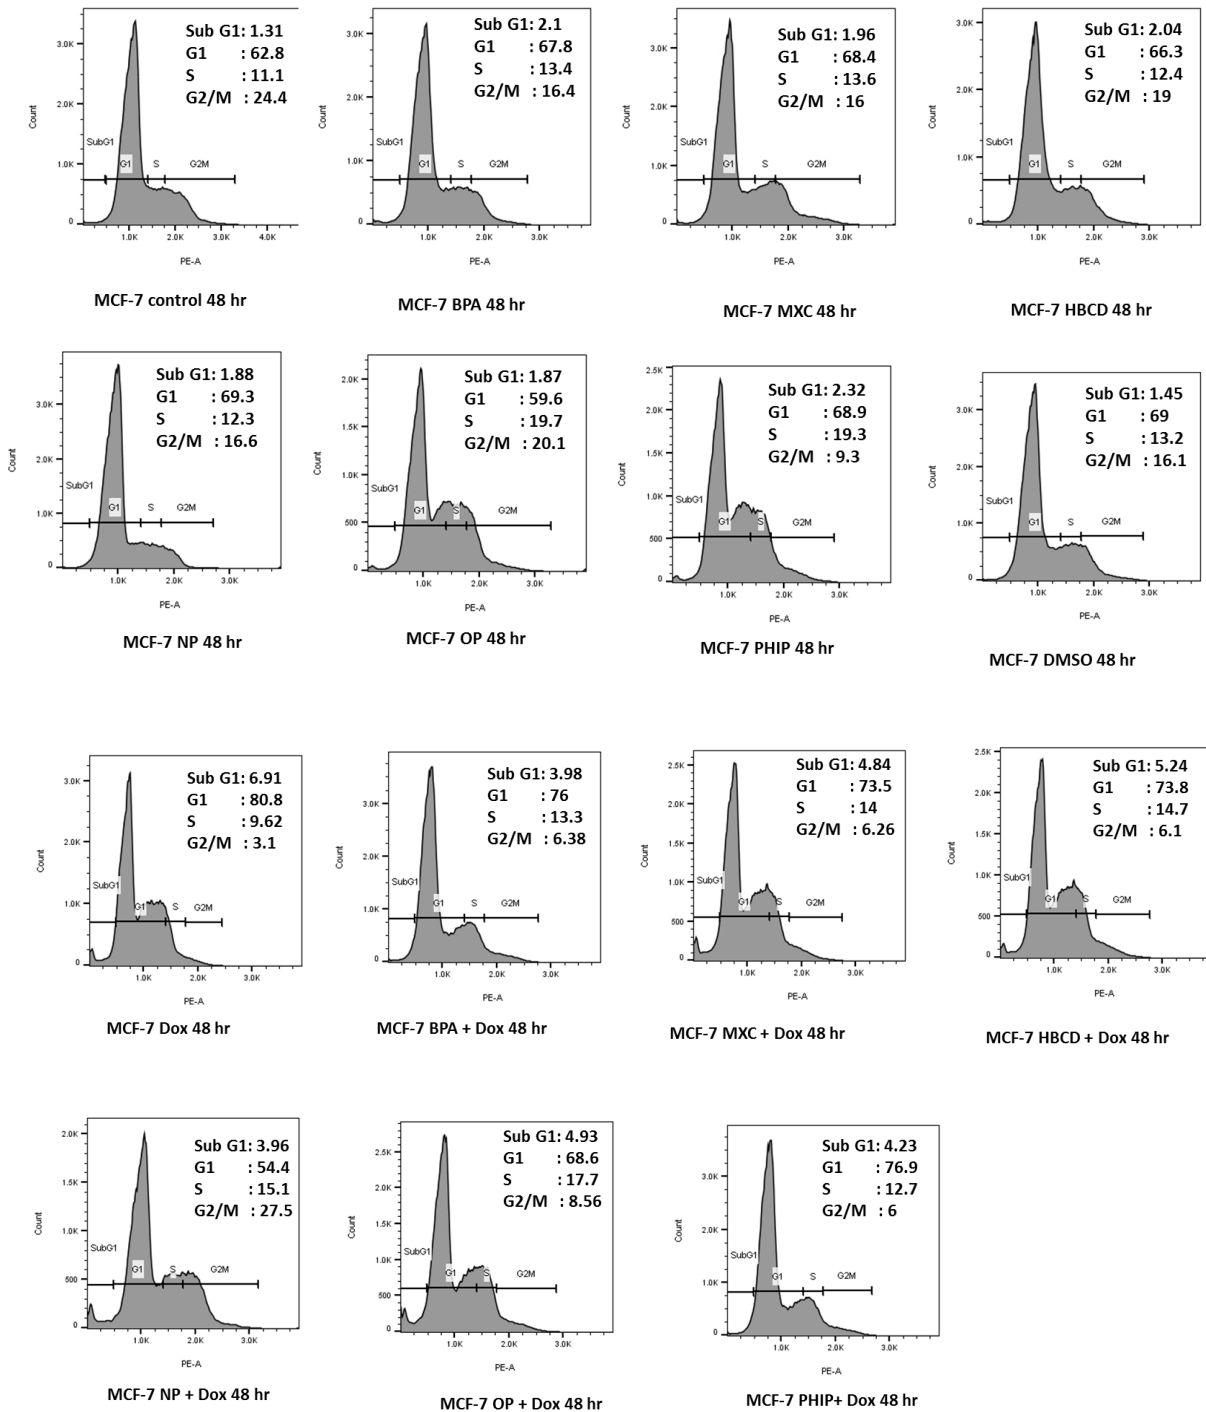

**Figure 2 : Cell cycle analysis of MCF-7 at 48 hr incubation.**

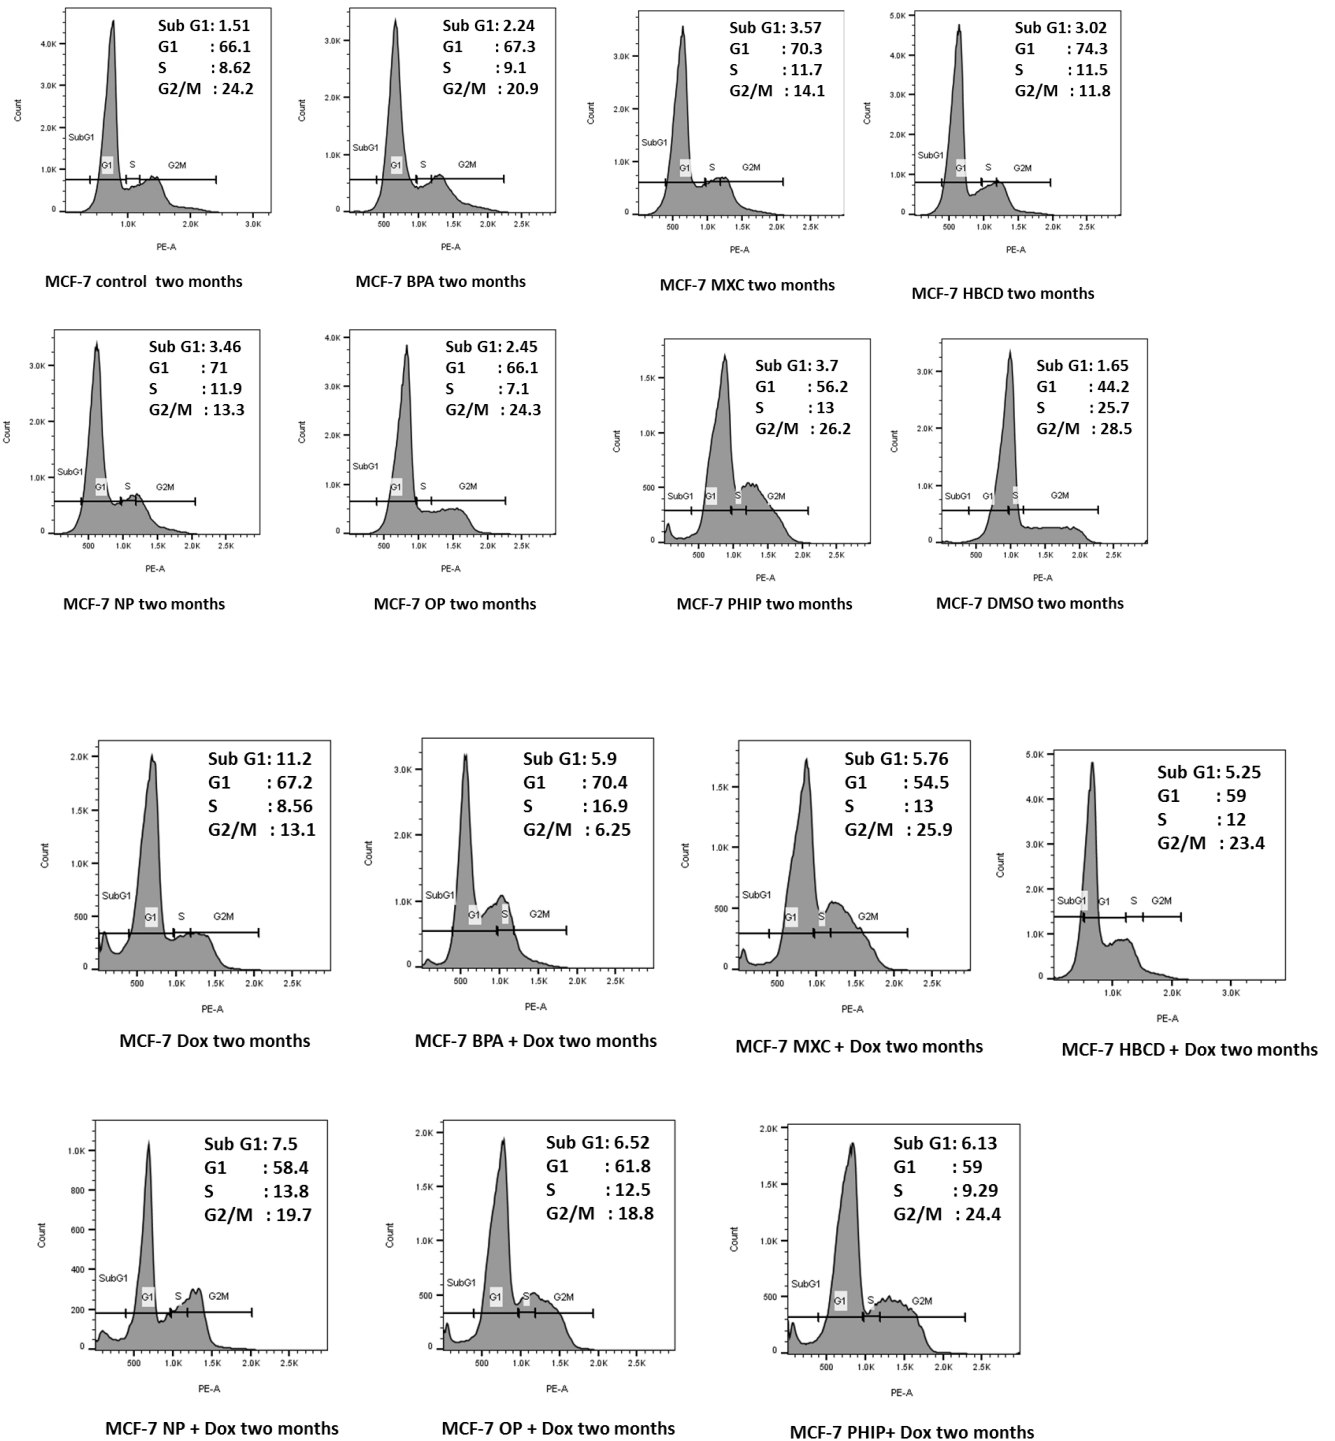

**Figure 3 : Cell cycle analysis of MCF-7 at two months incubation.**
